# Supplementary material for: An exceptionally facile method to produce layered double hydroxides on a conducting substrate and their application for solar water splitting without an external bias
Source: Royal Society of Chemistry journal article supplement (doi:10.1039/c3ee43965h), 2014-01-01
Supplement: c3ee43965h1.pdf [file c3ee43965h1.pdf]

## Electronic Supplementary Information (ESI)

*Revised ESI: published on 19<sup>th</sup> May 2014*

**An exceptionally facile method to produce layered double hydroxides on a conducting substrate and their application for solar water splitting without an external bias**

Seungho Cho,<sup>†</sup> Ji-Wook Jang,<sup>†</sup> Yoon Bin Park, Jae Young Kim, Ganesan Magesh, Jin Hyun Kim, Minsu Seol, Kijung Yong, Kun-Hong Lee\* and Jae Sung Lee\*

Department of Chemistry, Department of Chemical Engineering and School of Environmental engineering science, Pohang University of Science and Technology (POSTECH), San 31, Hyoja-Dong, Pohang, South Korea, 790-784

School of Nano-Bio Science and Chemical Engineering, Ulsan National Institute of Science and Technology (UNIST), 50 UNIST-gil, Ulsan, South Korea 689-798

<sup>†</sup>These authors contributed equally to this work.

\*Corresponding authors: E-mail: ce20047@postech.ac.kr (K.-H.L.); jlee1234@unist.ac.kr (J.S.L.)

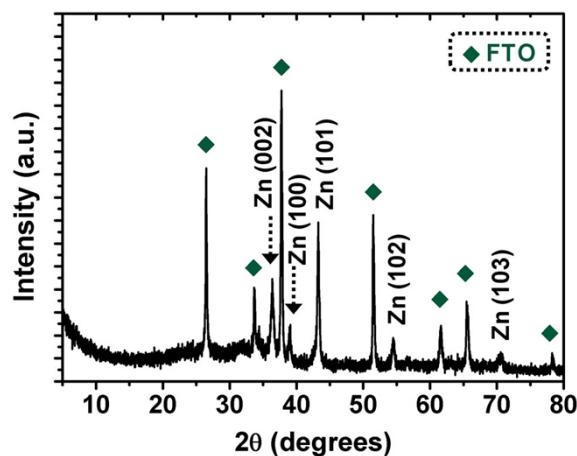

**Figure S1.** XRD pattern of Zn-deposited fluorine-doped tin oxide (FTO) glass.

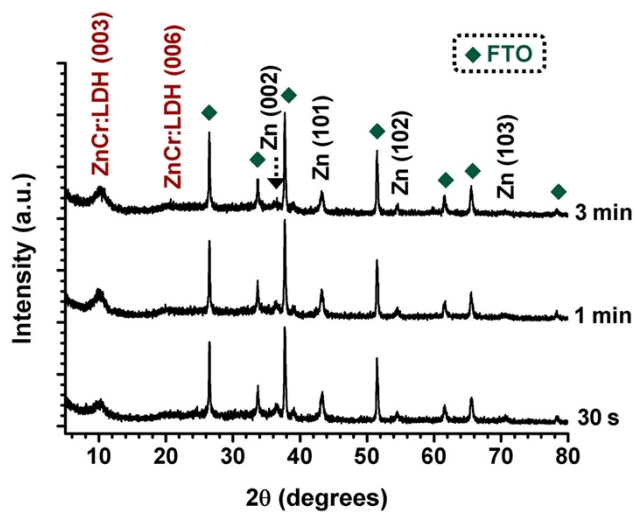

**Figure S2.** XRD patterns of Zn-deposited FTO glass with different Cr nitrate solution-dipping times.

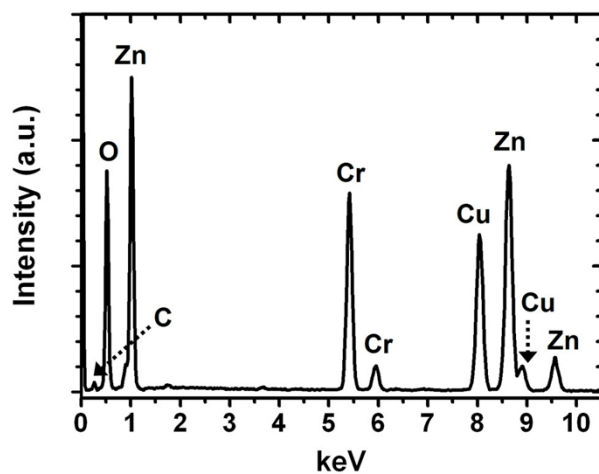

**Figure S3.** EDX pattern of particles detached from the substrate fabricated by the Cr nitrate solution-dipping process followed by calcination at 527°C in air for 2 h.

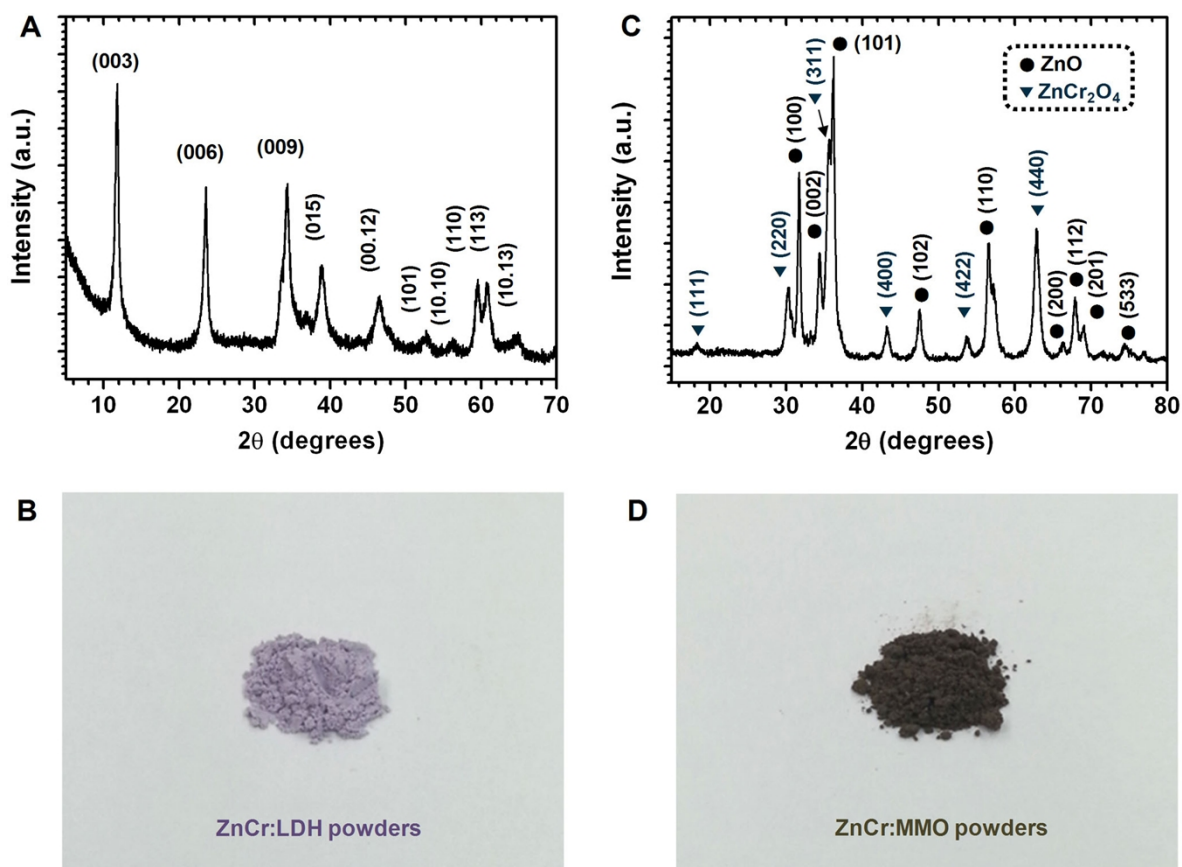

**Figure S4.** (A and B) XRD pattern and photograph of zinc chromium layered double hydroxide (ZnCr:LDH) powders synthesized by mixing of a 30 mL aqueous solution containing 1.4 M zinc nitrate hexahydrate and 0.6 M chromium nitrate nonahydrate and a 40 mL aqueous solution containing 3 M sodium hydroxide and 2.5 M sodium carbonate at 60°C for 24 h. (C and D) XRD pattern and photograph of zinc chromium mixed metal oxide (ZnCr:MMO) powders prepared by calcination of the ZnCr:LDH powders at 527°C in air for 2 h.

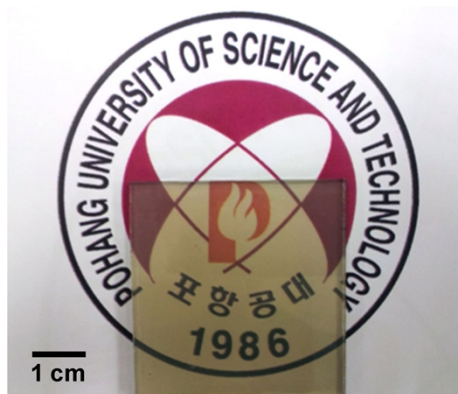

**Figure S5.** Photograph of the ZnCr:MMO/FTO glass fabricated by the Cr nitrate solution-dipping process followed by calcination at 527°C in air for 2 h.

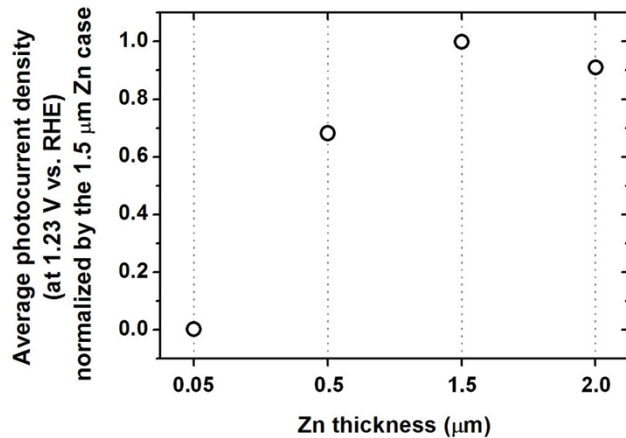

**Figure S6.** Average photocurrent densities at 1.23 V (vs. RHE) normalized by that of the 1.5 μm case as a function of Zn thicknesses. The photocurrent densities were measured in 0.2 M Na<sub>2</sub>SO<sub>4</sub> solution (pH 6.5) under visible light irradiation ( $\lambda > 420$  nm) for the ZnCr:MMO/FTO glass fabricated by dipping of a Zn-deposited FTO glass in a Cr nitrate solution for 1 min, followed by calcination.

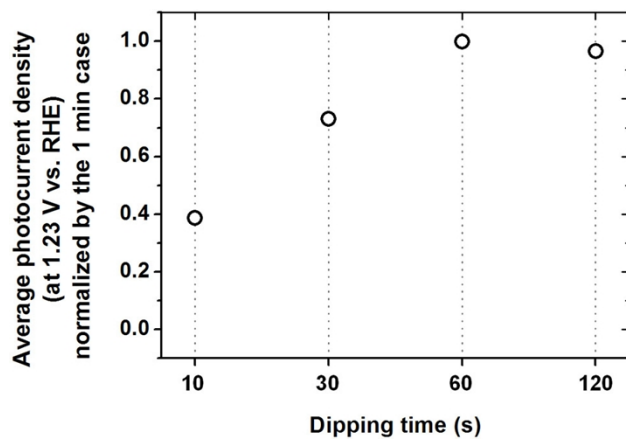

**Figure S7.** Average photocurrent densities at 1.23 V (vs. RHE) normalized by that of the 1 min dipping case as a function of dipping times. The photocurrent densities were measured in 0.2 M Na<sub>2</sub>SO<sub>4</sub> solution (pH 6.5) under visible light irradiation.

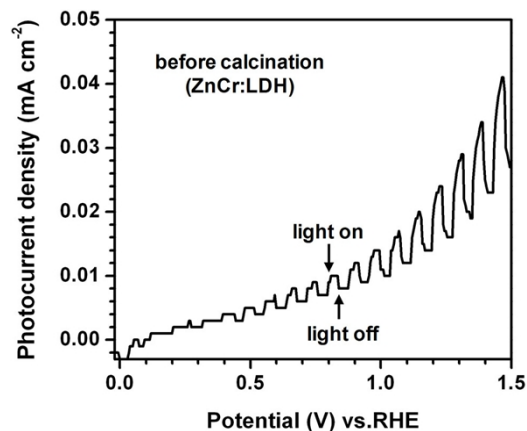

**Figure S8.** Current–voltage curve in 0.2 M Na<sub>2</sub>SO<sub>4</sub> solution (pH 6.5) under intermittent visible light irradiation ( $\lambda > 420$  nm) for the ZnCr:LDH/Zn/FTO glass fabricated by dipping of a Zn-deposited FTO glass in a Cr nitrate solution for 1 min.

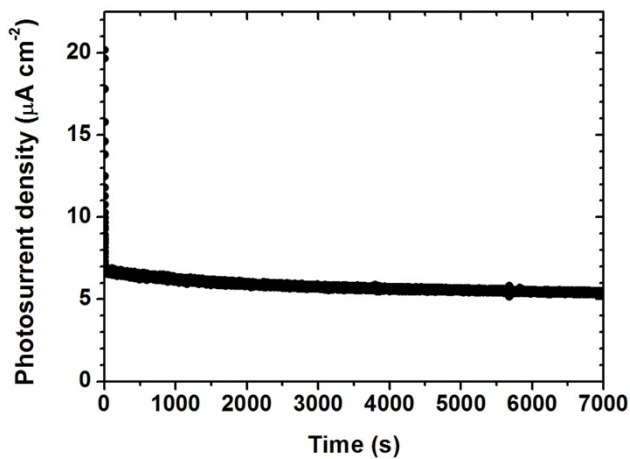

**Figure S9.** Current–time curve of CoO<sub>x</sub>-deposited ZnCr:MMO photoelectrode in a no-bias, two-electrode configuration with a Pt wire cathode.

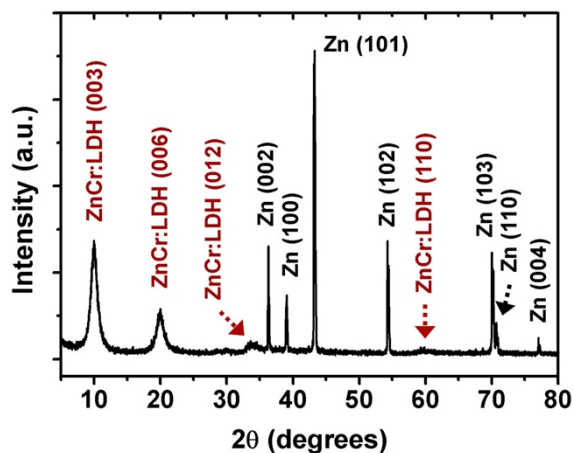

**Figure S10.** XRD pattern of a ZnCr:LDH/Zn substrate fabricated by immersing a Zn metal foil in Cr nitrate solution.
